# Supplementary material for: Luminescent Color-Adjustable Europium and Terbium Co-Doped Strontium Molybdate Phosphors Synthesized at Room Temperature Applied to Flexible Composite for LED Filter
Source: MDPI journal article supplement (doi:10.3390/cryst12040552), 2022-04-15
Supplement: s1 [file s1]

Supplementary Materials

# Luminescent Color-Adjustable Europium and Terbium Co-Doped Strontium Molybdate Phosphors Synthesized at Room Temperature Applied to Flexible Composite for LED Filter

Jae-Yong Jung

Research and Business Development Foundation, Engineering Building, Silla University, Busan 45985, Korea; eayoung21@naver.com; Tel.: +82-51-999-6441

**Citation:** Jung, J.-Y. Luminescent Color-Adjustable Europium and Terbium Co-doped Strontium Molybdate Phosphors Synthesized at Room Temperature Applied to Flexible Composite for LED Filter. *Crystals* **2022**, *12*, 552. <https://doi.org/10.3390/cryst12040552>

Academic Editor: Pier Carlo Ricci

Received: 6 April 2022

Accepted: 13 April 2022

Published: 15 April 2022

**Publisher's Note:** MDPI stays neutral with regard to jurisdictional claims in published maps and institutional affiliations.

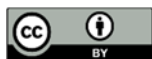

**Copyright:** © 2022 by the author. Licensee MDPI, Basel, Switzerland. This article is an open access article distributed under the terms and conditions of the Creative Commons Attribution (CC BY) license (<https://creativecommons.org/licenses/by/4.0/>).

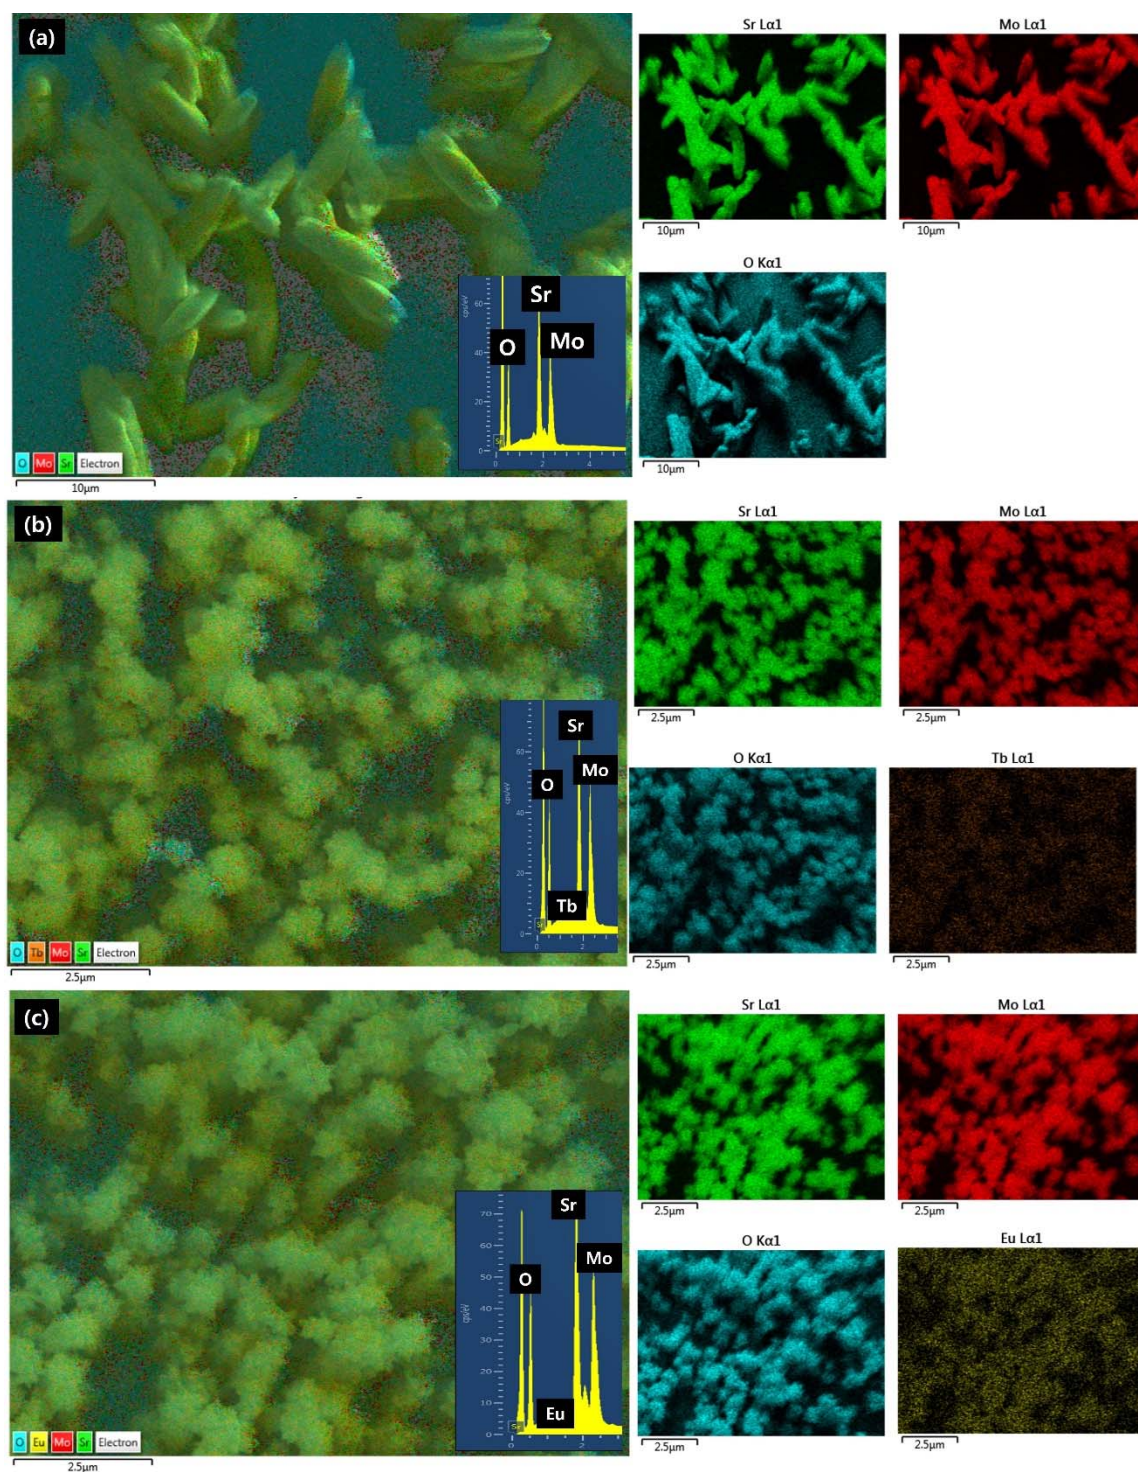

**Figure S1.** SEM-EDS results (a) SrMoO<sub>4</sub>, (b) SrMoO<sub>4</sub>:Tb<sup>3+</sup>, and (c) SrMoO<sub>4</sub>:Eu<sup>3+</sup> powders.

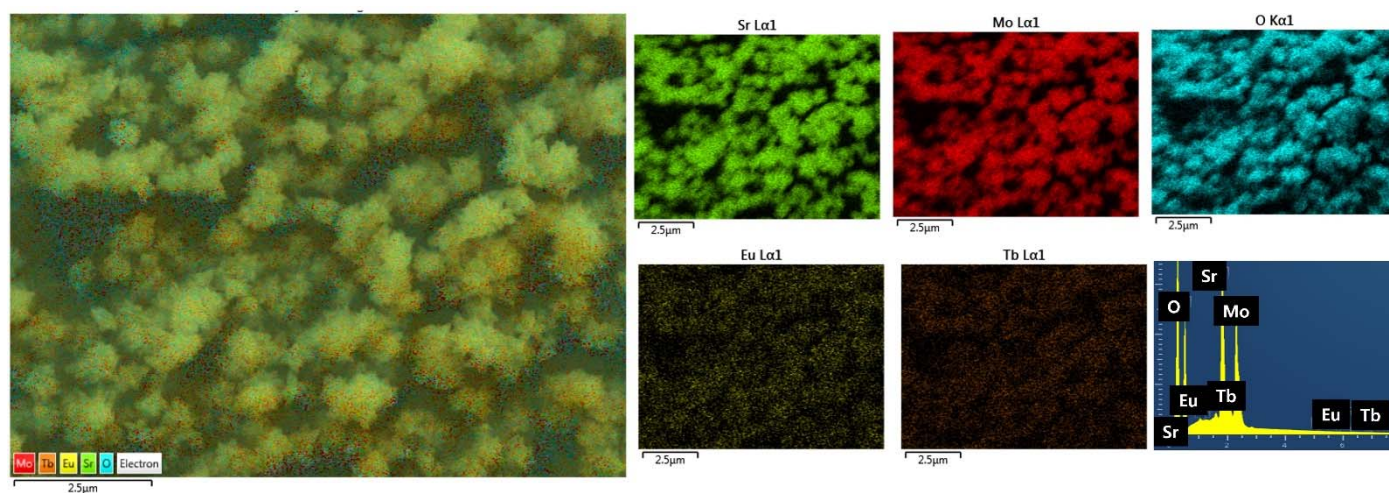

**Figure S2.** SEM-EDS results of  $\text{SrMoO}_4\text{:}[\text{Eu}^{3+}]/[\text{Tb}^{3+}]$  powders.
